# Supplementary material
Source: publisher site journal article supplement (https://www.dovepress.com/article/519114)

Fig. S1 Preprocessing of scRNA-seq and array data

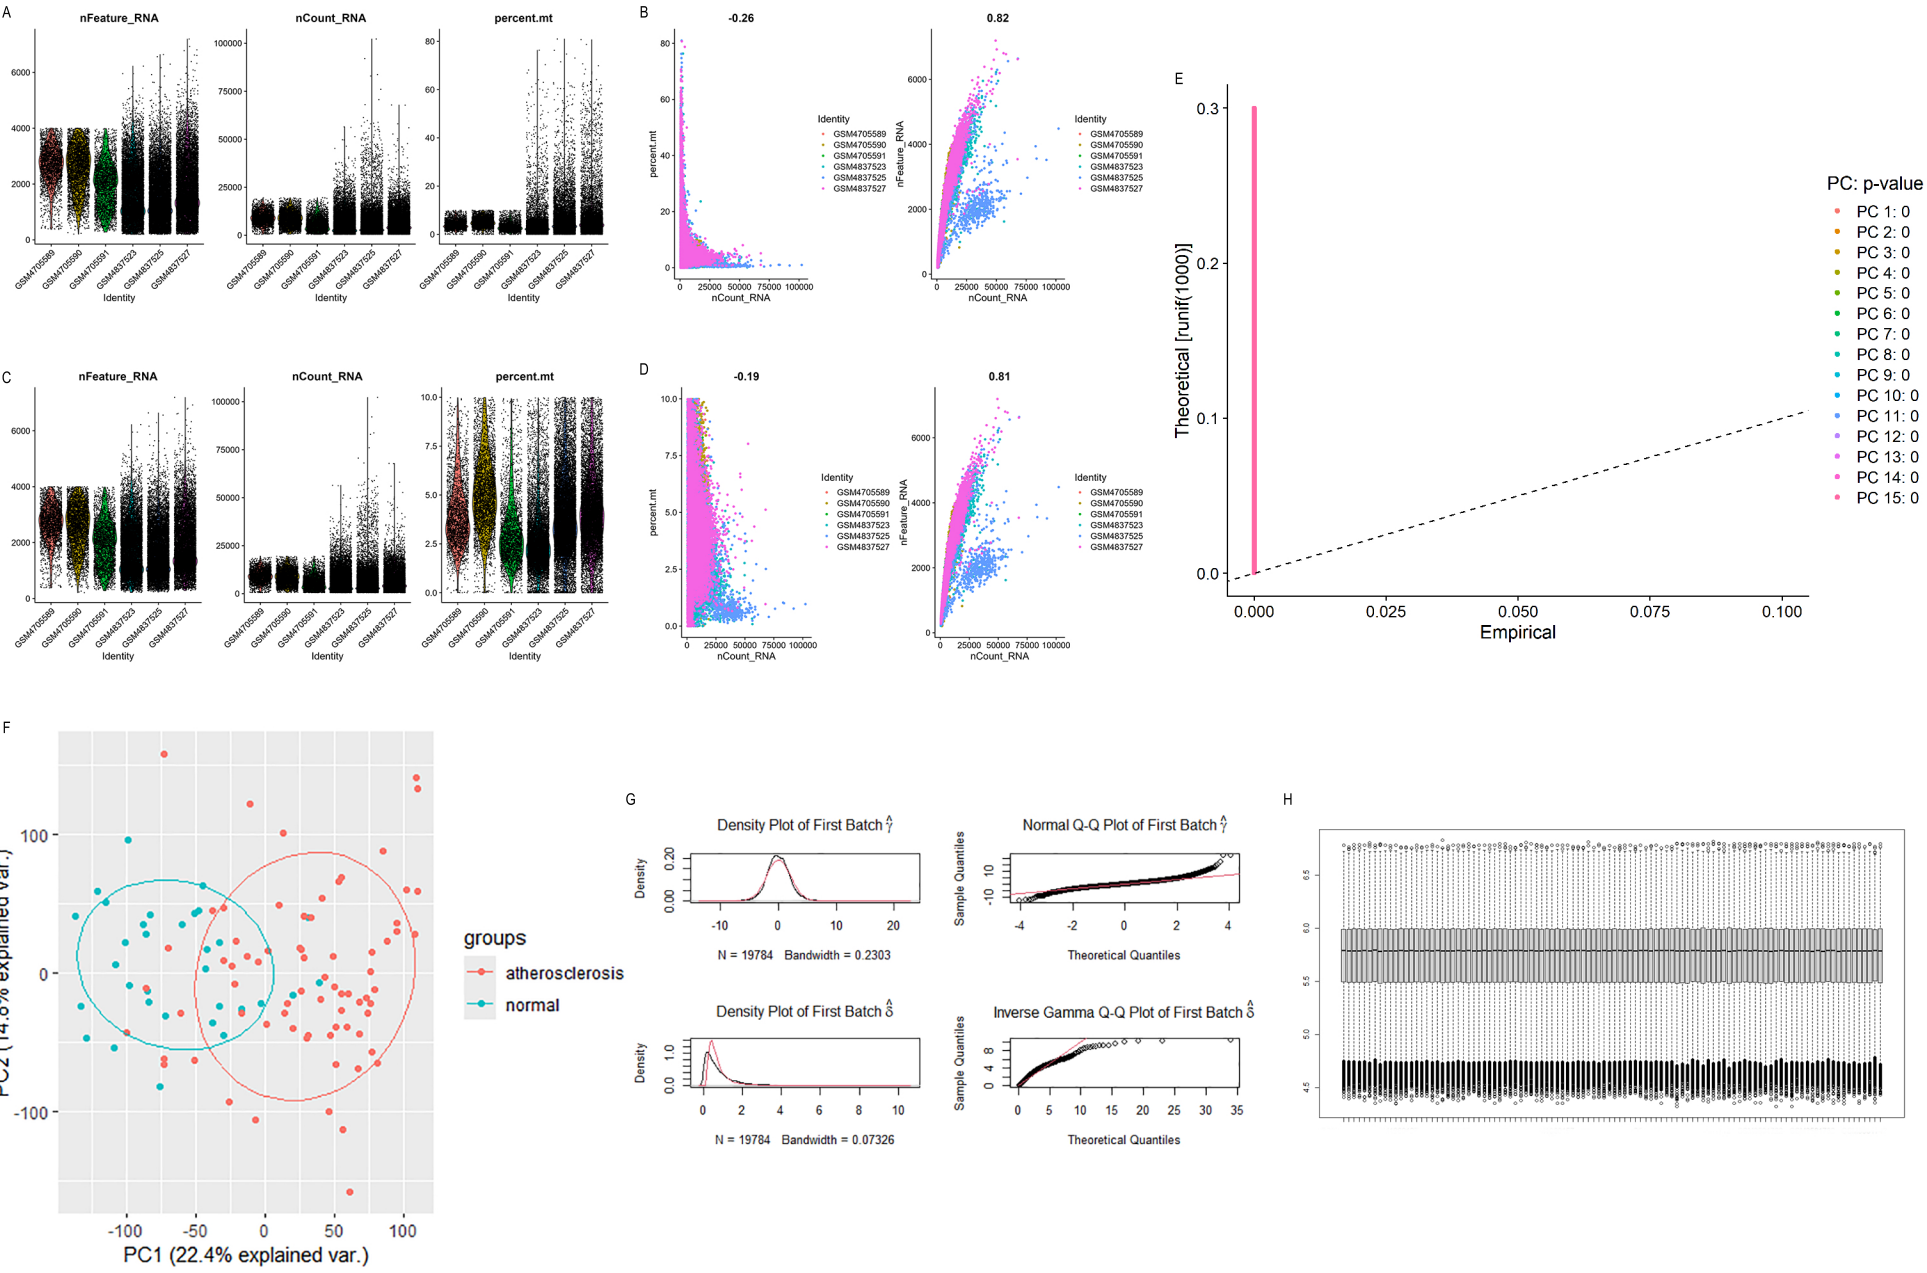

A-B The nfeature and mtDNA percentage before filtering. C-D The nfeature and mtDNA percentage after filtering. E The p value of the 15 principal components with the smallest p value. F The principal component analysis of array data. G The Q-Q test of array data. H The boxplot of array data and the identification of outlier.

Fig. S2 The re-cluster and re-annotation of T / NK cells

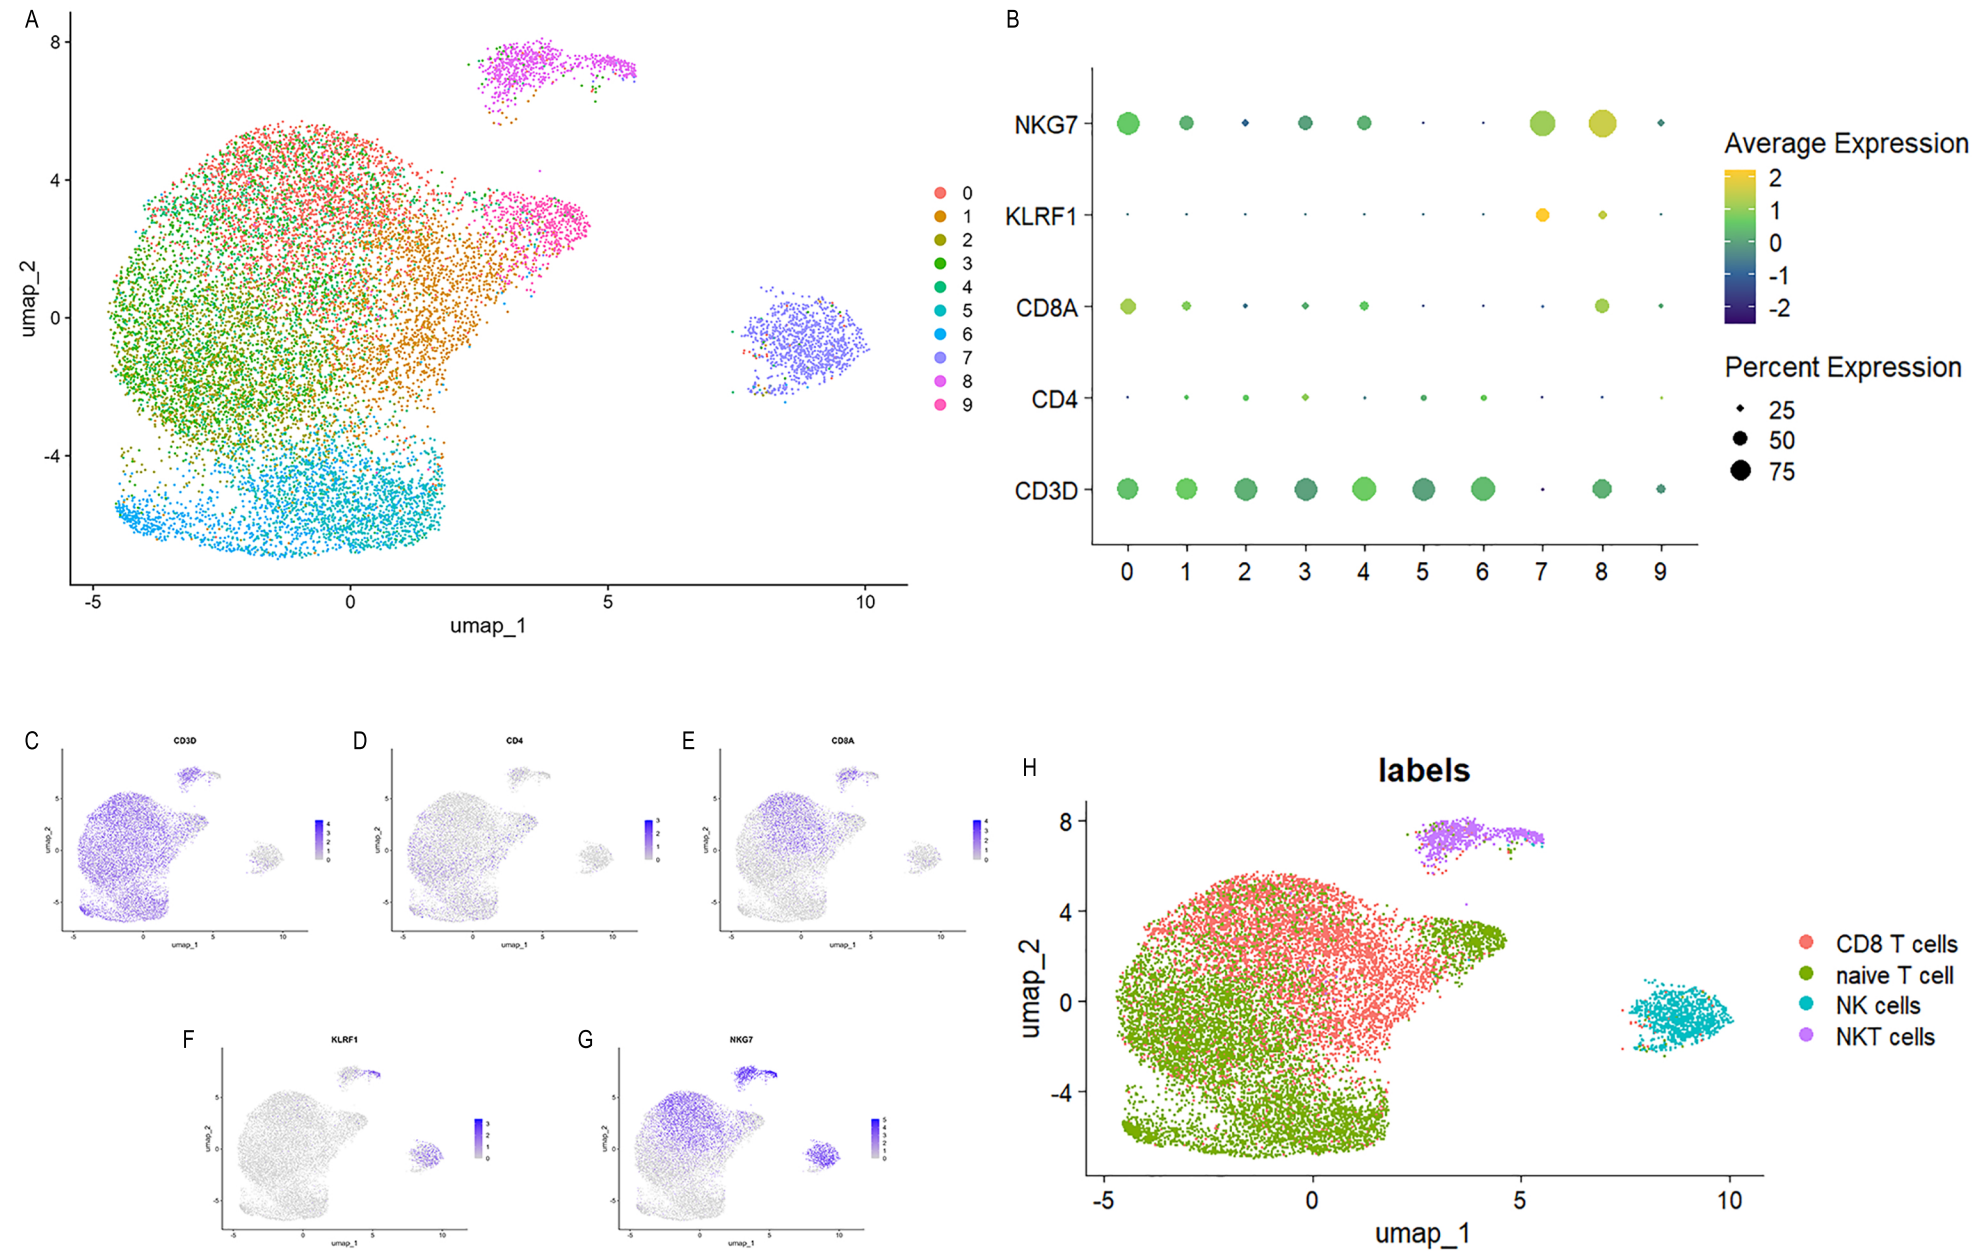

A The UMAP plot of T / NK cells which were divided into 10 clusters. B The expression of cell markers in each cluster. C-G The UMAP plot of the 5 cell markers. H The re-annotation of T / NK cells.

Fig. S3 The 25 known inhibitors that can bind to FABP4

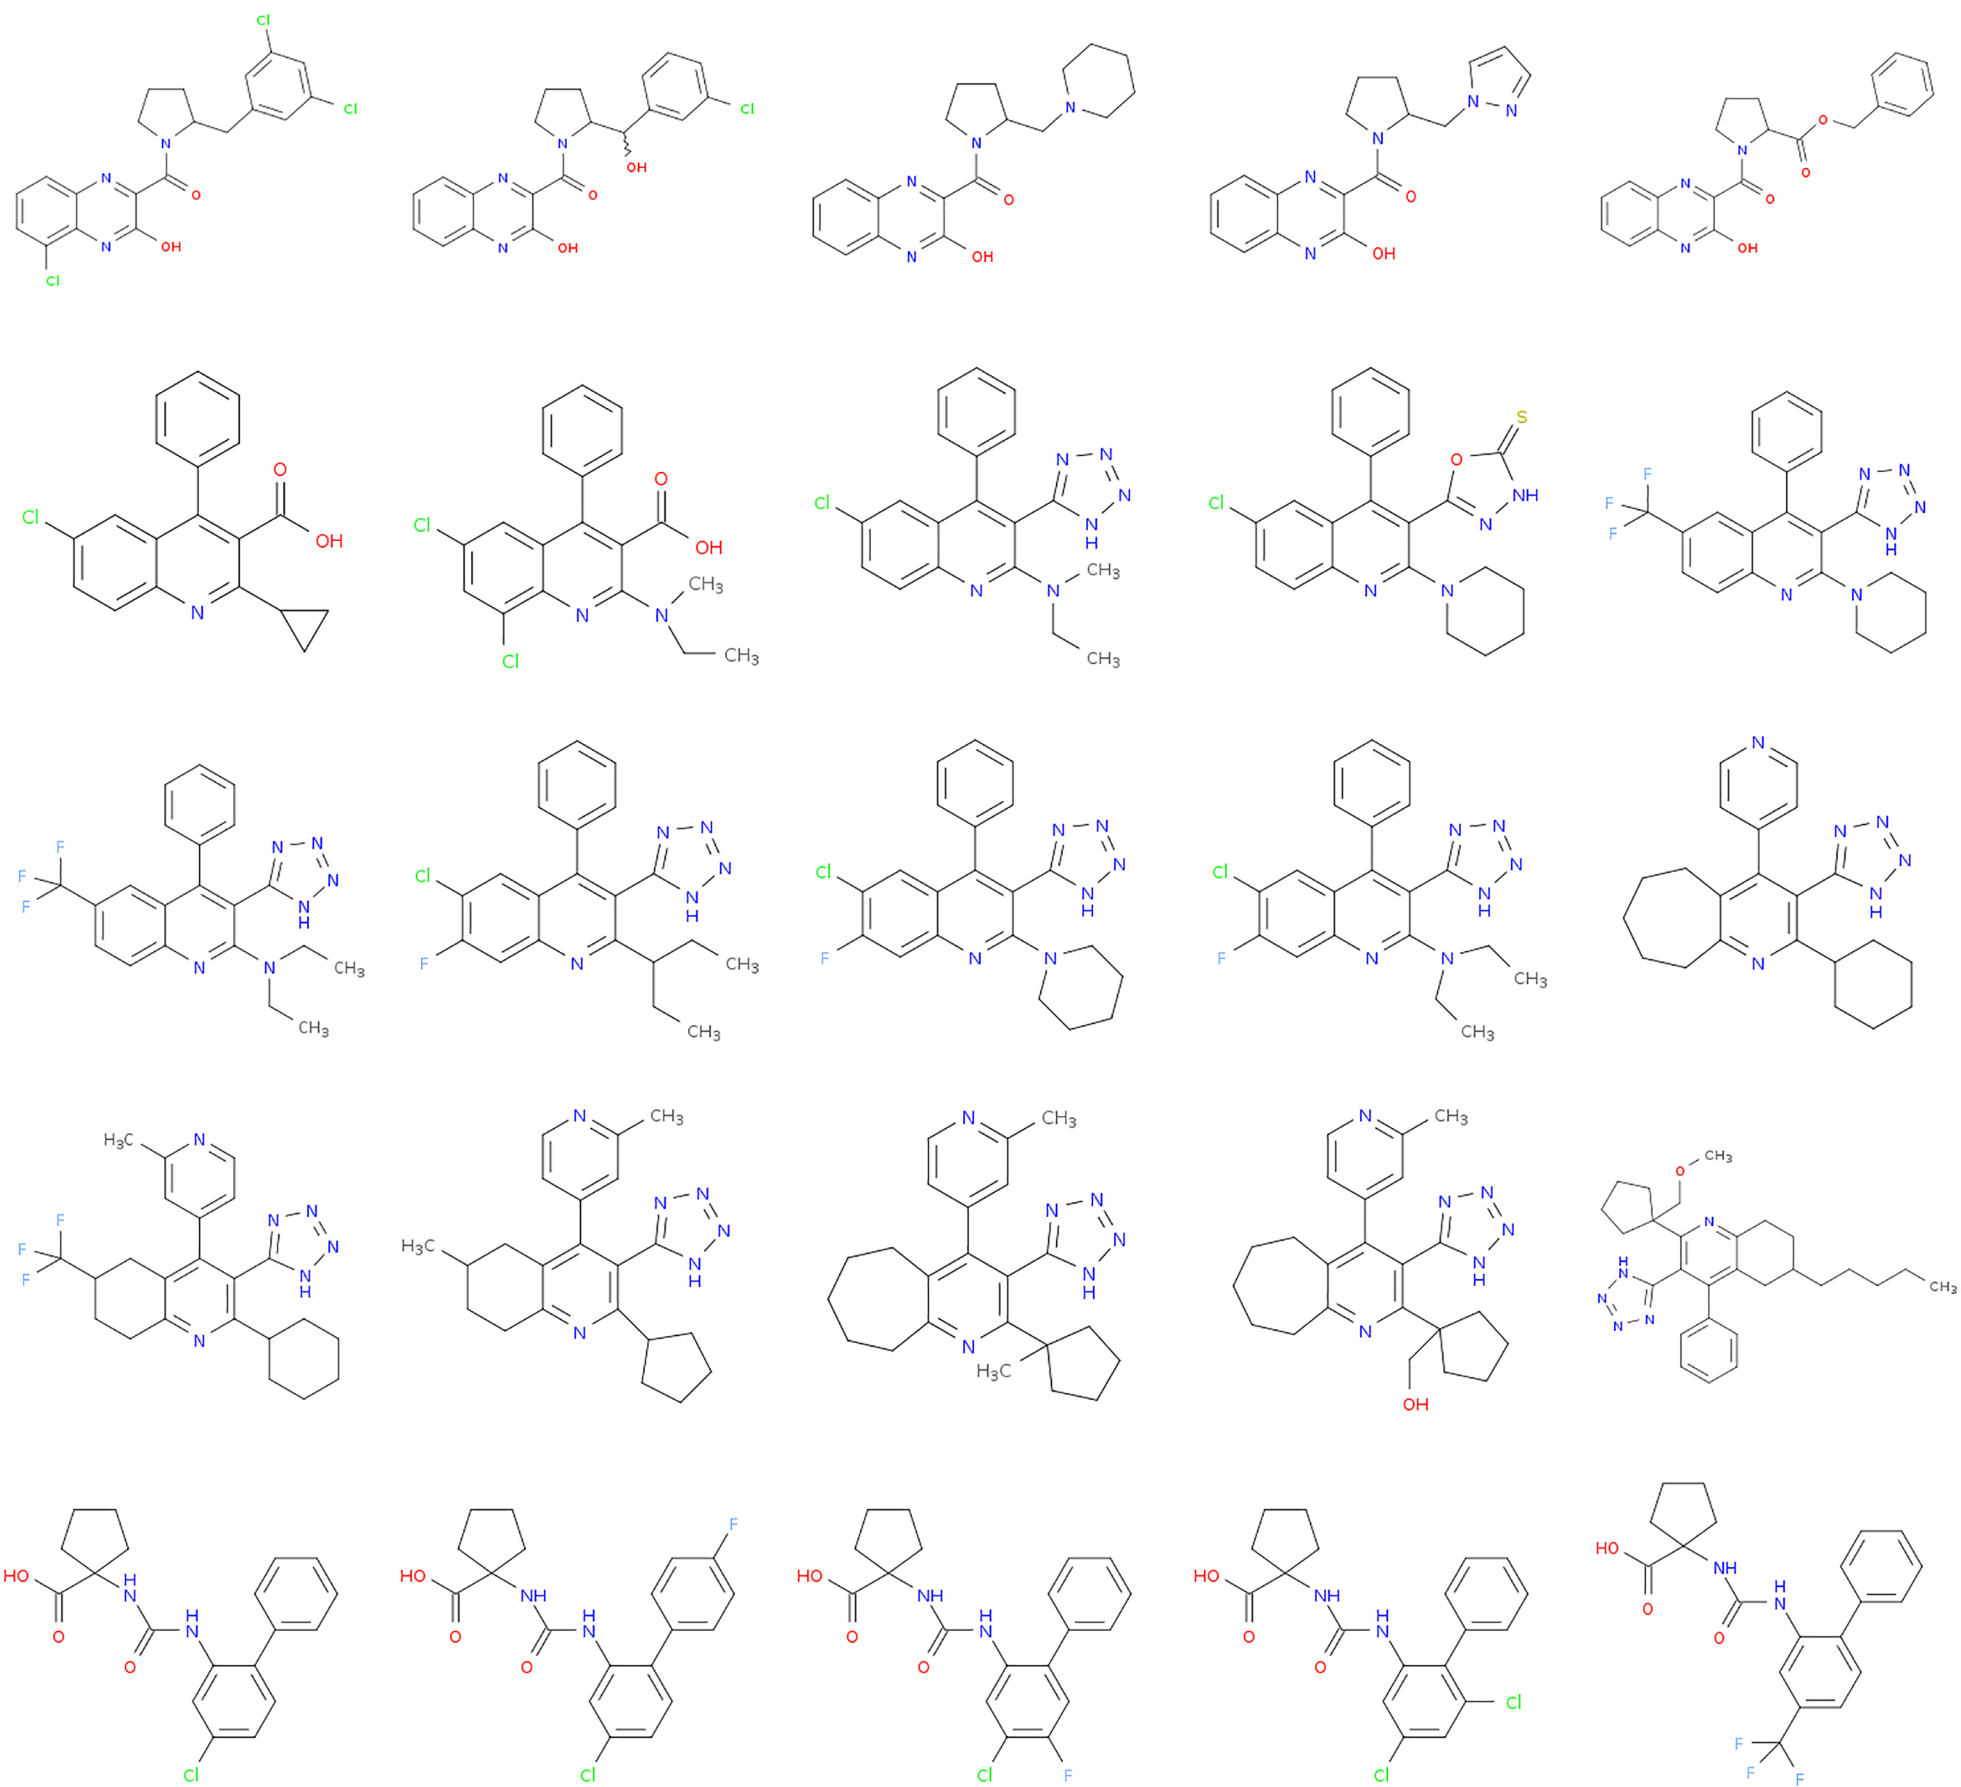

Supplement: Supplementary file 1 [file 519114%20Revised%20Supplementary%20Materials.pdf]
